# Supplementary material for: An aromatic carbonyl compound-linked conjugated microporous polymer as an advanced cathode material for lithium-organic batteries
Source: Royal Society of Chemistry journal article supplement (doi:10.1039/d0qm00335b), 2020-01-01
Supplement: d0qm00335b1.pdf [file d0qm00335b1.pdf]

## Supporting Information

### **Aromatic carbonyl compound-linked conjugated microporous polymer as an advanced cathode material for lithium-organic batteries**

Kang Li<sup>a,†</sup>, Qiang Li<sup>a,†</sup>, Yunong Wang<sup>a</sup>, Heng-guo Wang<sup>a,b,\*</sup>, Yanhui Li<sup>a</sup>, and Zhenjun Si<sup>a,\*</sup>

<sup>a</sup> School of Materials Science and Engineering, Changchun University of Science and Technology, Changchun 130022, China.

<sup>b</sup> Key Laboratory of Polyoxometalate Science of the Ministry of Education and Faculty of Chemistry, Northeast Normal University, 5628 Renmin Street, Changchun, 130024, P. R. China.

† These authors contributed equally to this work and should be considered co-first authors.

\* **Corresponding author.**

E-mail address: [wanghengguo@cust.edu.cn](mailto:wanghengguo@cust.edu.cn); [szj@cust.edu.cn](mailto:szj@cust.edu.cn)

## Experiment section

### Materials.

Pyrene, 1,3,5-tris(4,4,5,5-tetramethyl-1,2-dioxaborolan-2-yl)benzene, sodium periodate ( $\text{NaIO}_4$ ), tetrakis(triphenylphosphine)palladium(0), sodium bicarbonate ( $\text{NaHCO}_3$ ), potassium carbonate ( $\text{K}_2\text{CO}_3$ ), *N*-bromosuccinimide (NBS), trifluoroacetic acid ( $\text{CF}_3\text{COOH}$ ) and 1-Methyl-2-pyrrolidinone (NMP) were purchased from Aladdin Chemical Reagent Co. Ltd. Ruthenium (III) chloride hydrate ( $\text{RuCl}_3 \cdot x\text{H}_2\text{O}$ ) was purchased from J&K Scientific Co. Ltd. *N,N*-dimethylformamide (DMF, AR), dichloromethane ( $\text{CH}_2\text{Cl}_2$ , AR), dimethyl sulfoxide (DMSO, AR), acetonitrile ( $\text{CH}_3\text{CN}$ , AR), tetrahydrofuran (THF, AR), ethanol (AR) and methanol (AR) were purchased from Tianjin Fuyu Fine Chemical Co. Ltd. Sulfuric acid ( $\text{H}_2\text{SO}_4$ ) was purchased from Beijing Chemicals Co. Ltd. All the materials were used without further purification. Water used in our experiments was deionized.

### Synthesis of pyrene-4,5,9,10-tetraone (PT)

Pyrene-4,5,9,10-tetraone (PT) was synthesized according to the reported method.<sup>S1,S2</sup> In brief, pyrene (10 mmol, 2.02 g) was first dissolved in a mixture of 40 mL  $\text{CH}_2\text{Cl}_2$  and 40 mL  $\text{CH}_3\text{CN}$ . Then,  $\text{NaIO}_4$  (82 mmol, 17.5 g), 50 mL  $\text{H}_2\text{O}$  and  $\text{RuCl}_3 \cdot x\text{H}_2\text{O}$  (0.12 mmol, 0.25 g) were successively added to the mixture. The reaction mixture was stirred at 35-40 °C overnight. After reaction, the obtained mixture was poured into 500 mL deionized  $\text{H}_2\text{O}$  and then extracted by  $\text{CH}_2\text{Cl}_2$ , saturated  $\text{NaHCO}_3$  solution and deionized  $\text{H}_2\text{O}$ , respectively. A dark yellow solid was obtained by condensing the organic solution, then, the crude product was recrystallized from DMSO to give 458 mg PT (17.5%, yield).  $^1\text{H}$  NMR (500 MHz,  $\text{DMSO-d}_6$ , ppm): 8.32 (d, 2H), 7.74 (t, 1H). FT-IR (KBr,  $\text{cm}^{-1}$ ): 1673, 1561, 1443, 1341, 1281, 1054, 1030, 911, 821, 708. UV-Vis (DMF, nm): 267, 293, 373.

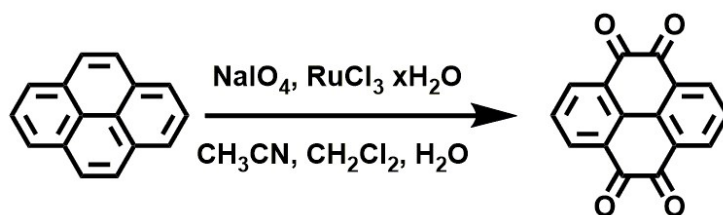

Scheme S1. Synthesize route of PT.

### Synthesis of 2,7-dibromopyrene-4,5,9,10-tetraone (PT-2Br)

PT-2Br was synthesized according to the previous work.<sup>S1,S3</sup> Briefly, the recrystallized PT (1 mM, 262 mg) was dissolved in a mixture of 2 mL CF<sub>3</sub>COOH and 5 mL H<sub>2</sub>SO<sub>4</sub>, then 1 mL H<sub>2</sub>SO<sub>4</sub> solution with NBS (3 mM, 534 mg) was added into the obtained mixture drop by drop. Then, the mixture was kept at 40 °C for 2 days with stirring. After reaction, the product was poured into 20 mL H<sub>2</sub>O and stirred for another 1 h. Finally, the crude product was collected by filtration and washed with saturated NaHCO<sub>3</sub> and H<sub>2</sub>O until the filtrate reaches neutral. After recrystallized from DMSO, 240 mg yellow PT-2Br was obtained (58%, yield). <sup>1</sup>H NMR (500 MHz, DMSO-d<sub>6</sub>, ppm): 8.36 (s). FT-IR (KBr, cm<sup>-1</sup>): 1679, 1548, 1274, 1087, 1030, 900, 721. UV-Vis (DMF, nm): 271, 381.

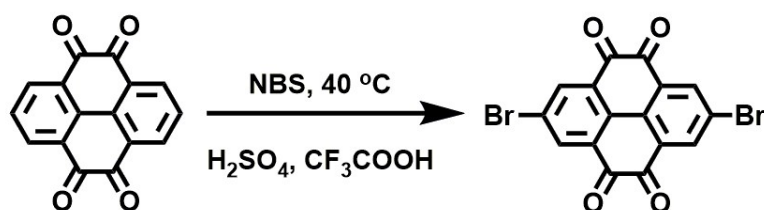

Scheme S2. Synthesize routes of PT-2Br.

### Material Characterization.

Scanning electron micrograph (SEM) was performed by JEM-6701F (JEOL Ltd.). Powder X-ray diffraction (XRD) measurements were tested on Bruker D8 Focus Powder X-ray diffractometer using Cu K $\alpha$  radiation (40 kV, 20 mA). Fourier transform infrared (FT-IR) spectra were determined by PerkinElmer Frontier

equipment using the KBr pellet technique and Raman spectra were collected with a Renishaw 2000 model confocal microscopy Raman spectrometer.  $^1\text{H}$  NMR spectra were recorded in  $\text{DMSO-d}_6$  on Bruker AV-500 ( $^1\text{H}$  500 MHz). Thermal gravimetric (TG) analysis were carried out on TA SDT 2960 simultaneous thermal analyzer between 45 and 1000  $^\circ\text{C}$  at a heating rate of 10  $^\circ\text{C min}^{-1}$  under  $\text{N}_2$ .

### **Theory Calculation**

All the calculations were performed with the Gaussian 09 package. The geometrical structures of the ground states were optimized at B3LYP/6-31 G(d) level in gas phase by the Density functional theory (DFT).<sup>S4,S5</sup> All calculated results of MESP were performed with Multiwfn 3.3.9 programs and the cubman utility provided by the Gaussian 09 program package.<sup>S6</sup> All visualization of MESP plots are carried out by Visual Molecule Dynamics (VMD) software.<sup>S7</sup>

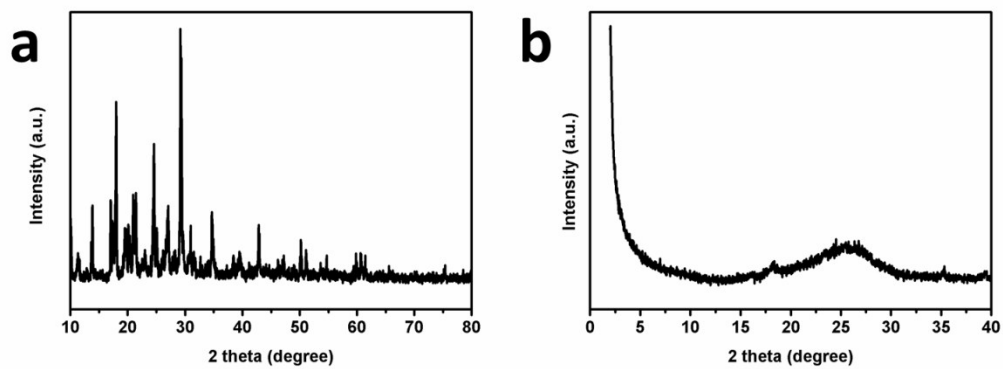

**Figure S1.** XRD spectra of PT and PT-BTA.

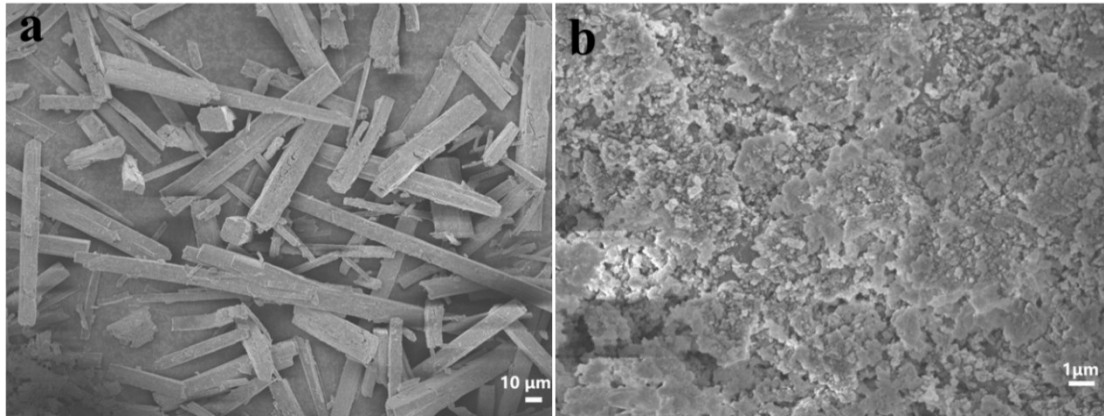

**Figure S2.** SEM images of (a) PT and (b) PT-BTA.

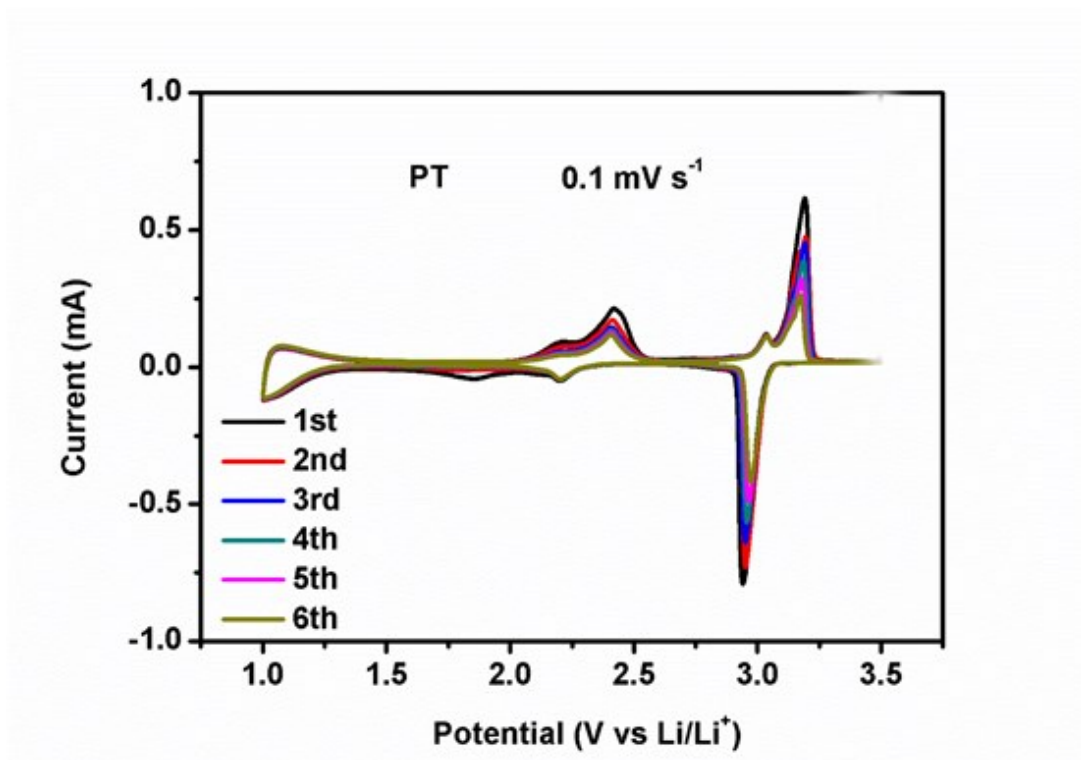

**Figure S3.** CV curves of PT at 0.1 mV s<sup>-1</sup>.

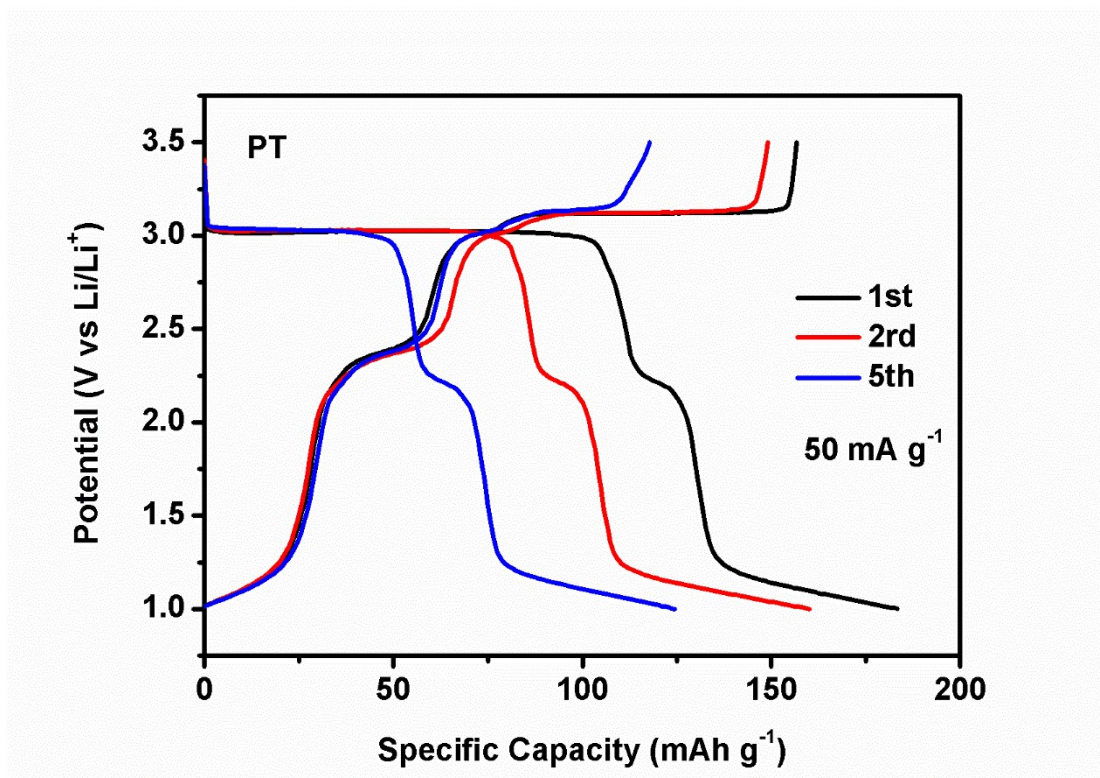

Figure S4. GDC profiles of PT at 0.05 A g<sup>-1</sup>.



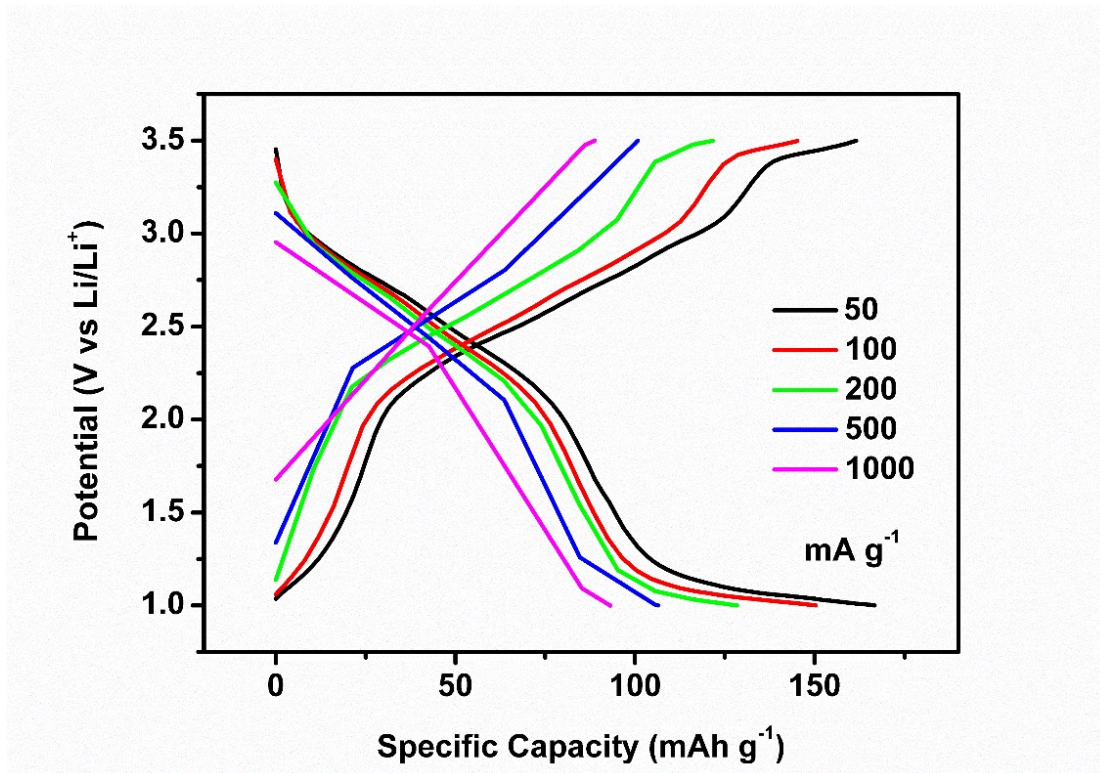

**Figure S5.** GDC profiles of PT-BTA at different current densities.

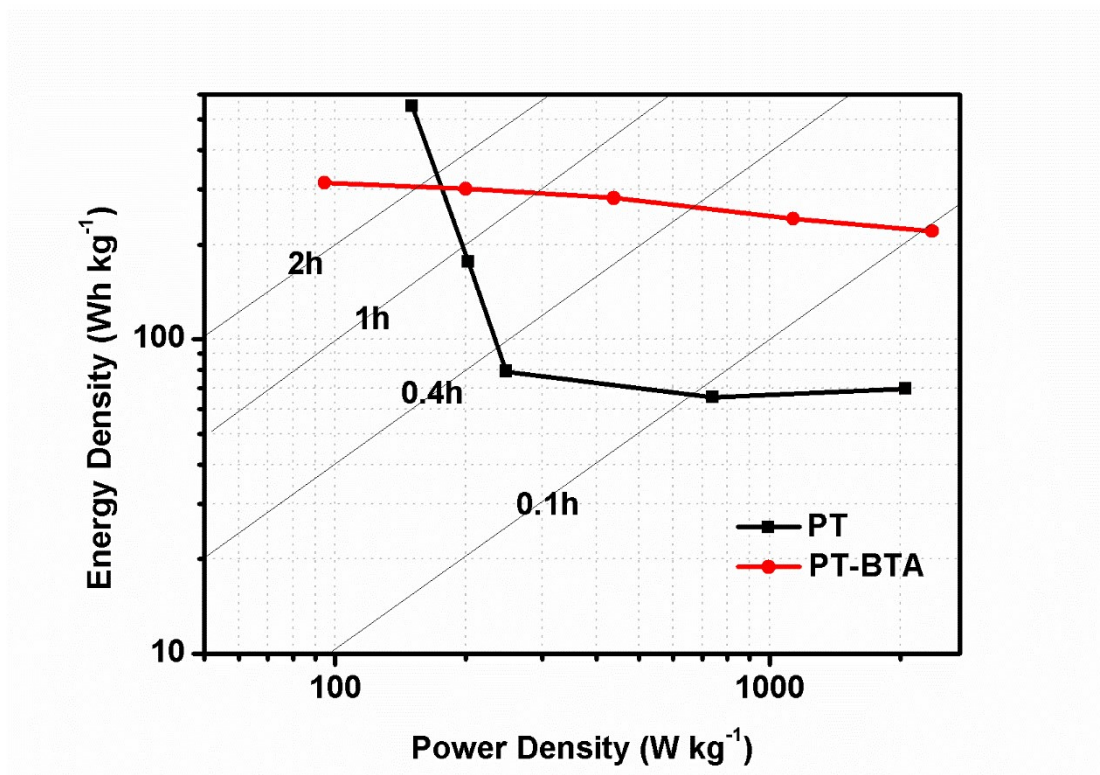

Figure S6. Ragone plots of PT and PT-BTA.

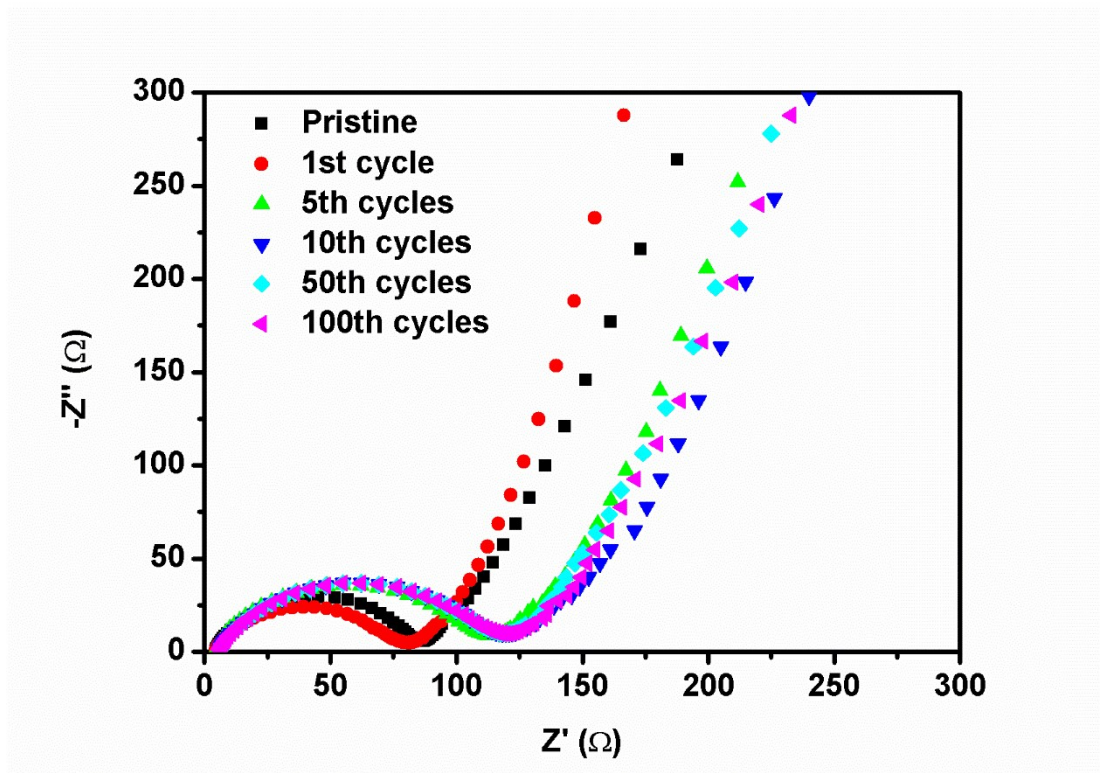

**Figure S7.** Nyquist plots of pristine PT-BTA cathode and after 1, 5, 10, 50 and 100 cycles.

**Table S1.** Summary of the electrochemical properties for organic electrode materials.

| Electrode Materials       | Composition                | Electrolytes                                     | Discharge Voltage (V vs Li/Li <sup>+</sup> ) | Initial                                   | Rate                                             |
|---------------------------|----------------------------|--------------------------------------------------|----------------------------------------------|-------------------------------------------|--------------------------------------------------|
|                           |                            |                                                  |                                              | Discharge Capacity (mAh g <sup>-1</sup> ) | capacity current density [mA g <sup>-1</sup> /C] |
| P(PyDI-T2) <sup>S8</sup>  | Active: MWCNT =1:1         | 1M LiPF <sub>6</sub> in EC/DEC/DMC (v/v/v 1:1:1) | /                                            | 40.6                                      | 7.5/0.2C                                         |
| NTAQ <sup>S9</sup>        | Active: KB: PVDF= 6:3:1    | 1 M LiTFSI in DOL/DME (v/v 1:1)                  | 2.25                                         | 130                                       | 62.4/5C                                          |
| 2D-PI@CNT <sup>S10</sup>  | Active: SP: Alg-Na= 8:1:1  | 1 M LiTFSI in DOL/DME (v/v 1:1)                  | 2.4                                          | 104.4                                     | 94/2A g <sup>-1</sup>                            |
| IEP-11-E12 <sup>S11</sup> | Active:MWCNT : PVDF= 5:4:1 | 1 M LiTFSI in DME/DOL (1:1 v/v)                  | 2.2 V                                        | 104                                       | 23/5C                                            |
| PPTC <sup>S3</sup>        | Active: CNTs = 1:2         | 1 M LiTFSI in DOL/DME (v/v 1:1)                  | 2.58                                         | 146.3                                     | 120.6/1 A g <sup>-1</sup>                        |
| PTCDAS <sup>S12</sup>     | Active: AB: PTFE= 80:15:5  | 1M LiPF <sub>6</sub> in EC/DMC (v/v1:1)          | 2.4                                          | 120-130                                   | /                                                |
| NOPS <sup>S13</sup>       | Active: KB: PVDF = 6:3:1   | 1M LiPF <sub>6</sub> in EC/DMC (v/v1:1)          | 2.52/2.48                                    | 175.4                                     | 133.5/0.5 A g <sup>-1</sup>                      |

---

|                         |                              |                                                          |                     |                                                   |
|-------------------------|------------------------------|----------------------------------------------------------|---------------------|---------------------------------------------------|
| NEP <sup>S13</sup>      | Active: KB:<br>PVDF= 6:3:1   | 1M LiPF <sub>6</sub> in<br>EC/DMC /<br>(v/v1:1)          | 127.3               | /                                                 |
| PI-1/2/3 <sup>S14</sup> | Active: AB:<br>PTFE= 80:15:5 | 1M LiPF <sub>6</sub> in<br>EC/DEC/DMC /<br>(v/v/v 1:1:1) | 61.7/103.4/<br>78.1 | /                                                 |
| S-PI <sup>S15</sup>     | Active: SP:<br>PVDF= 6:3:1   | 1M LiTFSI in<br>DOL/DME 2.5<br>(v/v 1:1)                 | 150                 | /                                                 |
| PCFCs <sup>S16</sup>    | Active: CNTs<br>= 8: 10      | 1 M LiPF <sub>6</sub> in<br>EC/DMC /<br>(v/v 1:1)        | 150                 | 48/2 A g <sup>-1</sup>                            |
| PGC40 <sup>S17</sup>    | Active: AB:<br>PVDF= 8:1:1   | 1 M LiPF <sub>6</sub> in<br>EC/DMC /<br>(v/v 1:1)        | 152                 | 86/1A g <sup>-1</sup>                             |
| PT-BTA                  | Active: AB:<br>PVDF= 3:6:1   | 1M LiTFSI in<br>DOL/DME 2.70/2.36<br>(v/v 1:1)           | 156.6               | 101.5/1A g <sup>-1</sup><br><sup>1</sup> (3.16 C) |

---

**Table S2.** MESP value of different atoms in PT-BTA calculated by DFT.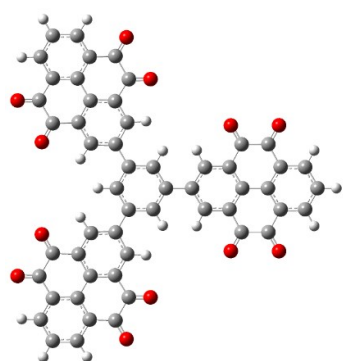

Molecular structure of PT-BTA

| Atom | All     | Positive | Negative | Atom | All     | Positive | Negative |
|------|---------|----------|----------|------|---------|----------|----------|
| 1    | -17.826 | 25.978   | -43.804  | 20   | 31.894  | 31.894   | NaN      |
|      | 32      | 11       | 43       |      | 72      | 72       |          |
| 2    | -17.832 | 25.973   | -43.806  | 21   | 31.881  | 31.881   | NaN      |
|      | 44      | 88       | 32       |      | 99      | 99       |          |
| 3    | 27.708  | 27.708   | NaN      | 22   | 31.889  | 31.889   | NaN      |
|      | 68      | 68       |          |      | 48      | 48       |          |
| 4    | 27.708  | 27.708   | NaN      | 23   | 31.874  | 31.874   | NaN      |
|      | 19      | 19       |          |      | 00      | 00       |          |
| 5    | 31.893  | 31.893   | NaN      | 24   | 9.404   | 9.404    | NaN      |
|      | 05      | 05       |          |      | 28      | 28       |          |
| 6    | 31.891  | 31.891   | NaN      | 25   | -34.368 | 9.414    | -43.782  |
|      | 73      | 73       |          |      | 54      | 30       | 84       |
| 7    | 31.902  | 31.902   | NaN      | 26   | -13.365 | 30.419   | -43.785  |
|      | 86      | 86       |          |      | 73      | 42       | 15       |
| 8    | 31.887  | 31.887   | NaN      | 27   | 30.419  | 30.419   | NaN      |
|      | 86      | 86       |          |      | 95      | 95       |          |
| 9    | 25.966  | 25.966   | NaN      | 28   | 16.416  | 16.416   | NaN      |
|      | 31      | 31       |          |      | 28      | 28       |          |

---

|    |        |        |     |    |         |        |         |
|----|--------|--------|-----|----|---------|--------|---------|
| 10 | 25.977 | 25.977 | NaN | 29 | 16.423  | 16.423 | NaN     |
|    | 12     | 12     |     |    | 16      | 16     |         |
| 11 | 14.663 | 14.663 | NaN | 30 | 31.886  | 31.886 | NaN     |
|    | 66     | 66     |     |    | 56      | 56     |         |
| 12 | 14.677 | 14.677 | NaN | 31 | 31.884  | 31.884 | NaN     |
|    | 24     | 24     |     |    | 47      | 47     |         |
| 13 | 14.674 | 14.674 | NaN | 32 | 31.887  | 31.887 | NaN     |
|    | 74     | 74     |     |    | 89      | 89     |         |
| 14 | 14.671 | 14.671 | NaN | 33 | -11.894 | 31.886 | -43.781 |
|    | 20     | 20     |     |    | 61      | 54     | 15      |
| 15 | 30.374 | 30.374 | NaN | 34 | -29.075 | 14.683 | -43.759 |
|    | 45     | 45     |     |    | 59      | 80     | 39      |
| 16 | 16.419 | 16.419 | NaN | 35 | 14.688  | 14.688 | NaN     |
|    | 32     | 32     |     |    | 19      | 19     |         |
| 17 | 16.424 | 16.424 | NaN | 36 | 25.985  | 25.985 | NaN     |
|    | 92     | 92     |     |    | 80      | 80     |         |
| 18 | 16.425 | 16.425 | NaN | 37 | 25.985  | 25.985 | NaN     |
|    | 75     | 75     |     |    | 67      | 67     |         |
| 19 | 16.424 | 16.424 | NaN | 38 | 27.706  | 27.706 | NaN     |
|    | 46     | 46     |     |    | 56      | 56     |         |

---

Note: NaN represents no value.

## References

- S1. J. A. Letizia, S. Cronin, R. P. Ortiz, A. Facchetti, M. A. Ratner and T. J. Marks, Phenacyl-thiophene and quinone semiconductors designed for solution processability and air-stability in high mobility n-channel field-effect transistors, *Chem. Eur. J.*, 2010, **16**, 1911-1928.
- S2. Q. Xing, K. Song, T. Liang, Q. Liu, W. Sun and C. Redshaw, Synthesis, characterization and ethylene polymerization behaviour of binuclear nickel halides bearing 4,5,9,10-tetra(arylimino)pyrenylidenes, *Dalton. Trans.*, 2014, **43**, 7830.
- S3. Q. Li, D. N. Li, H. D. Wang, H. G. Wang, Y. H. Li, Z. J. Si, Q. Duan, Conjugated carbonyl polymer-based flexible cathode for superior lithium-organic batteries, *ACS Appl. Mater. Inter.*, 2019, **11**, 28801-28808.
- S4. I. Avilov, P. Minoofar, J. M. Cornil and L. De Cola, Influence of substituents on the energy and nature of the lowest excited states of heteroleptic phosphorescent Ir(III) complexes: a joint theoretical and experimental study, *J. Am. Chem. Soc.*, 2007, **129**, 8247-8258
- S5. J. Burgdörfer and L. J. Dubé, Multiple-scattering approach to coherent excitation in electron-capture collisions, *Phys. Rev. Lett.*, 1984, **52**, 2225-2228.
- S6. T. Lu and F. Chen, Multiwfn: a multifunctional wavefunction analyzer, *J. Comput. Chem.*, 2012, **33**, 580-592.
- S7. W. Humphrey, A. Dalke and K. Schulten, VMD: visual molecular dynamics, *J. Mol. Graph.*, 1996, **14**, 33-38.



- S8. N. Zindy, C. Aumaitre, M. Mainville, H. Saneifar, P. A. Johnson, D. Bélanger, and M. Leclerc, Pyrene diimide-based  $\pi$ -conjugated copolymer and single walled carbon nanotube composites for lithium ion batteries, *Chem. Mater.*, 2019, **31**, 8764–8773.
- S9. Z. H. Ba, Z. X. Wang, M. Luo, H. B. Li, Y. Z. Li, T. Huang, J. Dong, Q. H. Zhang, and X. Zhao, Benzoquinone-based polyimide derivatives as high-capacity and stable organic cathodes for lithium-ion batteries, *ACS Appl. Mater. Inter.*, 2020, **12**, 807–817.
- S10. G. Wang, N. Chandrasekhar, B. P. Biswal, D. Becker, S. Paasch, E. Brunner, M. Addicoat, M. Yu, R. Berger, and X. L. Feng, A Crystalline, 2D Polyarylimide Cathode for Ultrastable and Ultrafast Li Storage, *Adv. Mater.*, 2019, **31**, 1901478.
- S11. A. Molina, N. Patil, E. Ventosa, M. Liras, J. Palma and R. Marcilla, New anthraquinone-based conjugated microporous polymer cathode with ultrahigh specific surface area for high-performance lithium-ion batteries, *Adv. Funct. Mater.*, 2020, **30**, 1908074.
- S12. X. Y. Han, C. X. Chang, L. J. Yuan, T. L. Sun, and J. T. Sun, Aromatic carbonyl derivative polymers as high-performance li-ion storage materials, *Adv. Mater.*, 2007, **19**, 1616-1621.
- S13. C. Y. Chen, X. Zhao, H. B. Li, F. Gan, J. X. Zhang, J. Dong and Q. H. Zhang, Naphthalene-based polyimide derivatives as organic electrode materials for lithium-ion batteries, *Electrochim. Acta*, 2017, **229**, 387-395.
- S14. D. Tian, H. Z. Zhang, D. S. Zhang, Z. Chang, J. Han, X. P. Gao and X. H. Bu,

- Li-ion storage and gas adsorption properties of porous polyimides (PIs), *RSC Adv.*, 2014, **4**, 7506-7510.
- S15. F. Xu, J. T. Xia, W. Shi and S. A. Cao, Sulfonyl-based polyimide cathode for lithium and sodium secondary batteries: enhancing the cycling performance by the electrolyte, *Mater. Chem. Phys.*, 2016, **169**, 192-197.
- S16. C. P. Yuan, Q. Wu, Q. Shao, Q. Li, B. Gao, Q. Duan and H. G. Wang, Free-standing and flexible organic cathode based on aromatic carbonyl compound/carbon nanotube composite for lithium and sodium organic batteries, *J. Colloid Interf. Sci.*, 2018, **517**, 72-79.
- S17. C. P. Yuan, Q. Wu, Q. Li, Q. Duan, Y. H. Li and H. G. Wang, Nanoengineered ultralight organic cathode based on aromatic carbonyl compound/graphene aerogel for green lithium and sodium ion batteries, *ACS Sustain. Chem. Eng.*, 2018, **6**, 8392-8399.
